1 Evaluation of two Sigma Transwab® systems for Maintenance of Viability of  
2 pathogenic *Candida* spp. Using the Clinical and Laboratory Standards Institute M40-  
3 A2 Standard

4

5 E. Elcocks<sup>a</sup> and E.C. Adukwu<sup>a#</sup>

6

7 <sup>a</sup>Centre for Research in Biosciences, Faculty of Health and Applied Sciences,  
8 University of the West of England, Bristol, United Kingdom, BS16 1QY.

9

10 Running Head: Recovery of *Candida* spp. Using Swab Transport Systems

11

12 # Address correspondence to E. Adukwu, [Emmanuel.Adukwu@uwe.ac.uk](mailto:Emmanuel.Adukwu@uwe.ac.uk)

13

14

15

16

17

18

19

20

21

22

23

24

25

26 **ABSTRACT**

27 A key aspect to routine microbiology processes include the retrieval, transport and  
28 maintenance of specimens. Swab transport systems (STS) can be utilised for their low  
29 cost, ease of use and their ability to recover and maintain specimens over long  
30 durations. An increase in healthcare complications due to fungal infections raises the  
31 requirement for STS to efficiently recover and preserve pathogens of yeast origin. The  
32 Clinical and Laboratory Standards Institute (CLSI) M40-A2 protocol is used to assess  
33 the compliance of STS to a quality control standard but at present does not include  
34 the recovery of yeast. The aim of this study was to compare the results of two  
35 commercial STS and their ability to recover and maintain viability of five clinical and  
36 reference strains of *Candida* spp., including *C. auris*, when stored at room temperature  
37 and 4°C, over 48 h, using the qualitative roll plate method. Findings from this study  
38 indicate that the STS used in this study are suitable for the collection and maintenance  
39 of the *Candida* spp. tested, and is very suitable for the recovery of clinical *C. auris*.

40

41

42

43

44

45

46

47

48

49

50

## 51 INTRODUCTION

52 There has been a global increase of infections caused by invasive fungi, with molds  
53 and yeasts repeatedly described as pathogens (1). Of these infections, it is indicated  
54 that *Candida* spp. are a leading cause, and candidiasis effects more than a quarter of  
55 a million patients worldwide every year (2). This increase in opportunistic fungal  
56 pathogens can be linked to the progression of medical actions such as chemotherapy  
57 and transplants which results in an increase in immuno-compromised patients (3).

58 One species of *Candida* that is of particular concern is *C. auris*. Since the discovery  
59 of *C. auris* in 2009 (4) there have been rising concerns due to its rapid spread across  
60 the globe in the short time since its discovery (5); common misidentification for other  
61 *Candida* spp. (6–9); the serious associated infections including reports of isolation  
62 from the bloodstream, urinary tract, ear canal, wounds, heart muscle and bone (10);  
63 high mortality rate (10–12); and it's antifungal resistance (6, 13). Rapid and efficient  
64 isolation and identification of these infectious agents are paramount to successful  
65 treatment, thus swab transport systems (STS) are often used for their low cost, ease  
66 of use and ability to maintain microorganism viability over extended periods of time  
67 (14). The Clinical and Laboratory Standards Institute (CLSI) M40-A2 is an approved  
68 standard which outlines testing procedures for liquid transport systems and provides  
69 manufacturers and end-users with a criteria for compliance (15). This protocol  
70 indicates the methodology to be used, storage conditions and length of incubation time  
71 for testing various STS. The protocol also outlines a list of organisms to be used for  
72 quality control, though amongst these organisms, yeasts are only indicated for urine  
73 transport systems. The compliance criteria of an STS in M40-A2 is described as no  
74 greater than 3 log decrease when stored at 4 °C or room temperature, or 1 log increase  
75 when stored at 4 °C. The enumeration should also be  $\geq 5$  CFU from the same dilution

76 as used in time-zero plate counts after the specified holding period. The aim of this  
77 study is to investigate and evaluate the efficiency of two commercial transport swabs  
78 to recover several *Candida* spp., including *C. auris*, using the qualitative roll-plate  
79 method outlined by the M40-A2.

80

## 81 **METHODS**

82 The method in this study followed the CLSI M40-A2 protocol with some minor  
83 adaptations. The STS used in this study were both manufactured by Medical Wire  
84 and Equipment (MWE; Corsham, UK) and included their Sigma Transwab®  
85 (MW176S) and Sigma Transwab® Purflock® (MW176PF). Both STS utilise a liquid  
86 amies carrying media. The Gram stain procedure was carried out on all species of  
87 *Candida*. *Candida* spp. stored on microbank beads at -80°C were grown on  
88 Sabouraud Dextrose Agar (SDA; EO Labs, Bonnybridge, UK) at 30°C for 48 h and  
89 used to inoculate 0.85% physiological saline (OXOID, Basingstoke, UK) until turbidity  
90 reached McFarland Standard 0.5 (OD<sub>625nm</sub> 0.08 – 0.1). Serial dilutions were made in  
91 saline and 100 µl of 10<sup>-2</sup> and 10<sup>-3</sup> dilutions were used to inoculate swabs aiming to  
92 achieve an approximate inoculation spike of 10<sup>5</sup> and 10<sup>6</sup> CFU/mL. Initial inocula was  
93 verified by plate count to determine CFU/ml. Three swabs were used per condition  
94 and incubated at either room temperature or 4°C for 0, 24 and 48 hours  
95 (T0/T24/T48). Swabs were plated using the roll plate method outlined in M40-A2  
96 onto SDA agar and incubated at 30°C for 48 h and then enumerated.

97

## 98 **RESULTS**

99 Results from Gram staining *Candida* spp. can be seen in Figure 1. All show the  
100 expected Gram positive appearance with typical round/oval budding morphology. All

101 strains of *Candida*, including *C. auris*, were successfully recovered by both STS. Both  
102 STS used were compliant with the M40-A2 criteria for all *Candida* spp. tested (Table  
103 1). No overgrowth of organisms is shown when stored at 4°C with most of the STS  
104 showing a slight decrease in CFU after 48 h, whilst all STS show an increase in CFU  
105 after 48 h when stored at room temp (Figure 2).

106

## 107 **DISCUSSION**

108 Both swab transport systems have demonstrated successful and efficient recovery  
109 and maintenance of *Candida* spp. and of particular interest is the recovery of *C.*  
110 *auris*. Considering the recent increase in global concern for *C. auris* and its  
111 associated implications, as previously mentioned, and in light of the findings from  
112 this study, MWE Sigma Transwab® and Sigma Transwab® Purflock® can be  
113 described as very suitable for the recovery of *C. auris* and can be implemented in the  
114 viability and transport of this opportunistic pathogen and aid in the timely treatment of  
115 associated infections. In a recent study (16) several *Candida* spp. were recovered  
116 using other commercial STS based on the M40-A2 protocol, however, the study did  
117 not investigate three of the *Candida* spp. in this study including the *C. auris*.

118 To our knowledge, this study is the first to evaluate STS efficiency and recovery of *C.*  
119 *auris* using the M40-A2 protocol. The M40-A2 does not currently directly address the  
120 recovery of yeasts, with the exception of guidance for urine transport systems (15).

121 In this study it was found that when using the protocol for adjusting initial inocula,  
122 enumeration was lower than that of bacteria, as expected, due to the difference in  
123 size of yeast and bacterial cells. Of the *Candida* spp. used within this study, only *C.*  
124 *auris* is a known clinical isolate. Though using a panel of clinically isolated bacteria  
125 would better reflect the use of STS in clinical situations, the use of reference strain

126 cultures is in-line with the M40-A2 protocol which utilises quality control strains for  
127 testing STS. With regards to a direct comparison of each STS, though the swab tip  
128 of each STS used in this study varied, the results from the foam or flocked swab  
129 were similar. One study (17) claims that foam swabs are superior to flocked swabs,  
130 though this preference was due to foam swabs ability to perform better when used in  
131 antigen testing experiments and not a reflection of the specimen recovery and  
132 maintenance.

133 Within this study, overgrowth was seen in both swabs for *C. auris* and in the Sigma  
134 swab for *C. albicans* at room temperature. When stored at 4°C, no overgrowth was  
135 seen in either STS. With an increase of transport delays being seen due to  
136 increasing costs for containment and movement of services to more central  
137 laboratories <sup>[18]</sup>, transport in cool temperatures is suitable, particularly for specimens  
138 of pathogenic yeast origin, and specimen maintenance would be ensured.

139

#### 140 **ACKNOWLEDGEMENTS**

141 This work was funded by Medical Wire and Equipment, Corsham, UK and supported  
142 by the Faculty of Health and Applied Sciences, University of the West of England,  
143 Bristol, UK. The funders had no role in data collection and interpretation, or the  
144 decisions involved with submitting the work for publication.

145

146

147

148

149

150

151 **REFERENCES**

- 152 1. Yapar N. 2014. Epidemiology and risk factors for invasive candidiasis. *Ther*  
153 *Clin Risk Manag* 10:95–105.
- 154 2. Arendrup MC, Patterson TF. 2017. Multidrug-Resistant *Candida*:  
155 Epidemiology, Molecular Mechanisms, and Treatment. *J Infect Dis* 216:S445–  
156 S451.
- 157 3. Vecchione A, Florio W, Celandroni F, Barnini S, Lupetti A, Ghelardi E. 2017.  
158 Comparative evaluation of six chromogenic media for presumptive yeast  
159 identification. *J Clin Pathol* 70:1074–1078.
- 160 4. Satoh K, Makimura K, Hasumi Y, Nishiyama Y, Uchida K, Yamaguchi H. 2009.  
161 *Candida auris* sp. nov., a novel ascomycetous yeast isolated from the external  
162 ear canal of an inpatient in a Japanese hospital. *Microbiol Immunol* 53:41–44.
- 163 5. Lockhart SR, Etienne KA, Vallabhaneni S, Farooqi J, Chowdhary A, Govender  
164 NP, Colombo AL, Calvo B, Cuomo CA, Desjardins CA, Berkow EL,  
165 Castanheira M, Magobo RE, Jabeen K, Asghar RJ, Meis JF, Jackson B,  
166 Chiller T, Litvintseva AP. 2017. Simultaneous emergence of multidrug-resistant  
167 *Candida auris* on 3 continents confirmed by whole-genome sequencing and  
168 epidemiological analyses. *Clin Infect Dis* 64:134–140.
- 169 6. Kathuria S, Singh PK, Sharma C, Prakash A, Masih A, Kumar A, Meis JF,  
170 Chowdhary A. 2015. Multidrug-resistant *Candida auris* misidentified as  
171 *Candida haemulonii*: Characterization by matrix-assisted laser desorption  
172 ionization-time of flight mass spectrometry and DNA sequencing and its  
173 antifungal susceptibility profile variability by vitek 2, CL. *J Clin Microbiol*  
174 53:1823–1830.
- 175 7. Lockhart SR, Jackson BR, Vallabhaneni S, Ostrosky-Zeichner L, Pappas PG,

- 176 Chiller T. 2017. Thinking beyond the common *Candida* species: Need for  
177 speciation of *Candida* due to the emergence of multidrug resistant *Candida*  
178 *auris*. J Clin Microbiol 55:JCM.01355-17.
- 179 8. Lockhart SR, Berkow EL, Chow N, Welsh RM. 2017. *Candida auris* for the  
180 Clinical Microbiology Laboratory: Not Your Grandfather's *Candida*  
181 Species. Clin Microbiol Newsl 39:99–103.
- 182 9. Kordalewska M. 2017. Rapid and Accurate Molecular Identification of the  
183 Emerging Multidrug-Resistant Pathogen *Candida auris* 55:2445–2452.
- 184 10. Sarma S, Upadhyay S. 2017. Current perspective on emergence, diagnosis  
185 and drug resistance in *Candida auris*. Infect Drug Resist 10:155–165.
- 186 11. Tsay S, Kallen A, Jackson BR, Chiller TM, Vallabhaneni S. 2018. Approach to  
187 the Investigation and Management of Patients with *Candida auris*, an  
188 Emerging Multidrug-Resistant Yeast. Clin Infect Dis 66:306–311.
- 189 12. Sears D, Schwartz BS. 2017. *Candida auris*: An emerging multidrug-resistant  
190 pathogen. Int J Infect Dis 63:95–98.
- 191 13. Chowdhary A, Voss A, Meis JF. 2016. Multidrug-resistant *Candida auris*: 'new  
192 kid on the block' in hospital-associated infections? J Hosp Infect 94:209–212.
- 193 14. Gizzie N, Adukwu E. 2016. Evaluation of liquid-based swab transport systems  
194 against the new approved CLSI M40-A2 standard. J Clin Microbiol 54:1152–  
195 1156.
- 196 15. Clinical and Laboratory Standards Institute C. 2014. M40-A2: Quality Control  
197 of Microbiological Transport Systems; Approved Standard - Second Edition,  
198 2nded.
- 199 16. Scansen KA, Bonsu BK, Stoner E, Mack K, Salamon D, Leber A, Marcon MJ.  
200 2010. Comparison of polyurethane foam to nylon flocced swabs for collection



201 of secretions from the anterior nares in performance of a rapid influenza virus  
202 antigen test in a pediatric emergency department. *J Clin Microbiol* 48:852–856.  
203 17. Van Horn KG, Audette CD, Sebeck D, Tucker KA. 2008. Comparison of the  
204 copan ESwab system with two amies agar swab transport systems for  
205 maintenance of microorganism viability. *J Clin Microbiol* 46:1655–1658.

206 Table 1 - Qualitative results of bacterial recovery of *Candida* spp. isolated from the Sigma Transwab® (MW176S) and Sigma  
 207 Transwab® Purflock® (MW176PF) at room temperature and at 4°C.

| Organism                                  | Swab            | Temp.      | Dilution 10 <sup>-2</sup> |      |      |            | Dilution 10 <sup>-3</sup> |      |      |            |
|-------------------------------------------|-----------------|------------|---------------------------|------|------|------------|---------------------------|------|------|------------|
|                                           |                 |            | 0hr                       | 24hr | 48hr | Compliance | 0hr                       | 24hr | 48hr | Compliance |
| <i>Candida auris</i><br>NCPF 8971         | <b>Sigma</b>    | <b>RT</b>  | TNTC                      | TNTC | TNTC | ✓          | 51                        | 50   | TNTC | ✓          |
|                                           | <b>Sigma</b>    | <b>4°C</b> | TNTC                      | 179  | 183  | ✓          | 51                        | 16   | 20   | ✓          |
|                                           | <b>Purflock</b> | <b>RT</b>  | TNTC                      | TNTC | TNTC | ✓          | 35                        | 55   | TNTC | ✓          |
|                                           | <b>Purflock</b> | <b>4°C</b> | TNTC                      | TNTC | 208  | ✓          | 35                        | 43   | 29   | ✓          |
| <i>Candida albicans</i><br>NCPF 3179      | <b>Sigma</b>    | <b>RT</b>  | 164                       | TNTC | TNTC | ✓          | 14                        | 117  | 255  | ✓          |
|                                           | <b>Sigma</b>    | <b>4°C</b> | 164                       | 153  | 134  | ✓          | 14                        | 14   | 13   | ✓          |
|                                           | <b>Purflock</b> | <b>RT</b>  | 176                       | TNTC | TNTC | ✓          | 14                        | 92   | 200  | ✓          |
|                                           | <b>Purflock</b> | <b>4°C</b> | 176                       | 100  | 133  | ✓          | 14                        | 12   | 17   | ✓          |
| <i>Candida tropicalis</i><br>NCPF 3111    | <b>Sigma</b>    | <b>RT</b>  | 128                       | TNTC | TNTC | ✓          | 14                        | 143  | TNTC | ✓          |
|                                           | <b>Sigma</b>    | <b>4°C</b> | 128                       | 71   | 66   | ✓          | 14                        | 4    | 5    | ✓          |
|                                           | <b>Purflock</b> | <b>RT</b>  | 102                       | TNTC | TNTC | ✓          | 12                        | 67   | 146  | ✓          |
|                                           | <b>Purflock</b> | <b>4°C</b> | 102                       | 77   | 55   | ✓          | 12                        | 5    | 9    | ✓          |
| <i>Candida parapsilosis</i><br>ATCC 22019 | <b>Sigma</b>    | <b>RT</b>  | 158                       | TNTC | TNTC | ✓          | 7                         | 46   | 236  | ✓          |
|                                           | <b>Sigma</b>    | <b>4°C</b> | 158                       | 58   | 109  | ✓          | 7                         | 10   | 6    | ✓          |
|                                           | <b>Purflock</b> | <b>RT</b>  | 135                       | TNTC | TNTC | ✓          | 13                        | 46   | 121  | ✓          |
|                                           | <b>Purflock</b> | <b>4°C</b> | 135                       | 120  | 154  | ✓          | 13                        | 9    | 13   | ✓          |
| <i>Candida glabrata</i><br>ATCC 2001      | <b>Sigma</b>    | <b>RT</b>  | 198                       | 96   | 269  | ✓          | 16                        | 8    | 20   | ✓          |
|                                           | <b>Sigma</b>    | <b>4°C</b> | 198                       | 71   | 113  | ✓          | 16                        | 4    | 10   | ✓          |
|                                           | <b>Purflock</b> | <b>RT</b>  | 171                       | 182  | 260  | ✓          | 18                        | 21   | 36   | ✓          |
|                                           | <b>Purflock</b> | <b>4°C</b> | 171                       | 197  | 165  | ✓          | 18                        | 17   | 23   | ✓          |

208 TNTC – too numerous to count; RT – Room temperature. (n=3)

209  
210  
211  
212  
213  
214  
215  
216  
217  
218  
219  
220  
221  
222  
223  
224

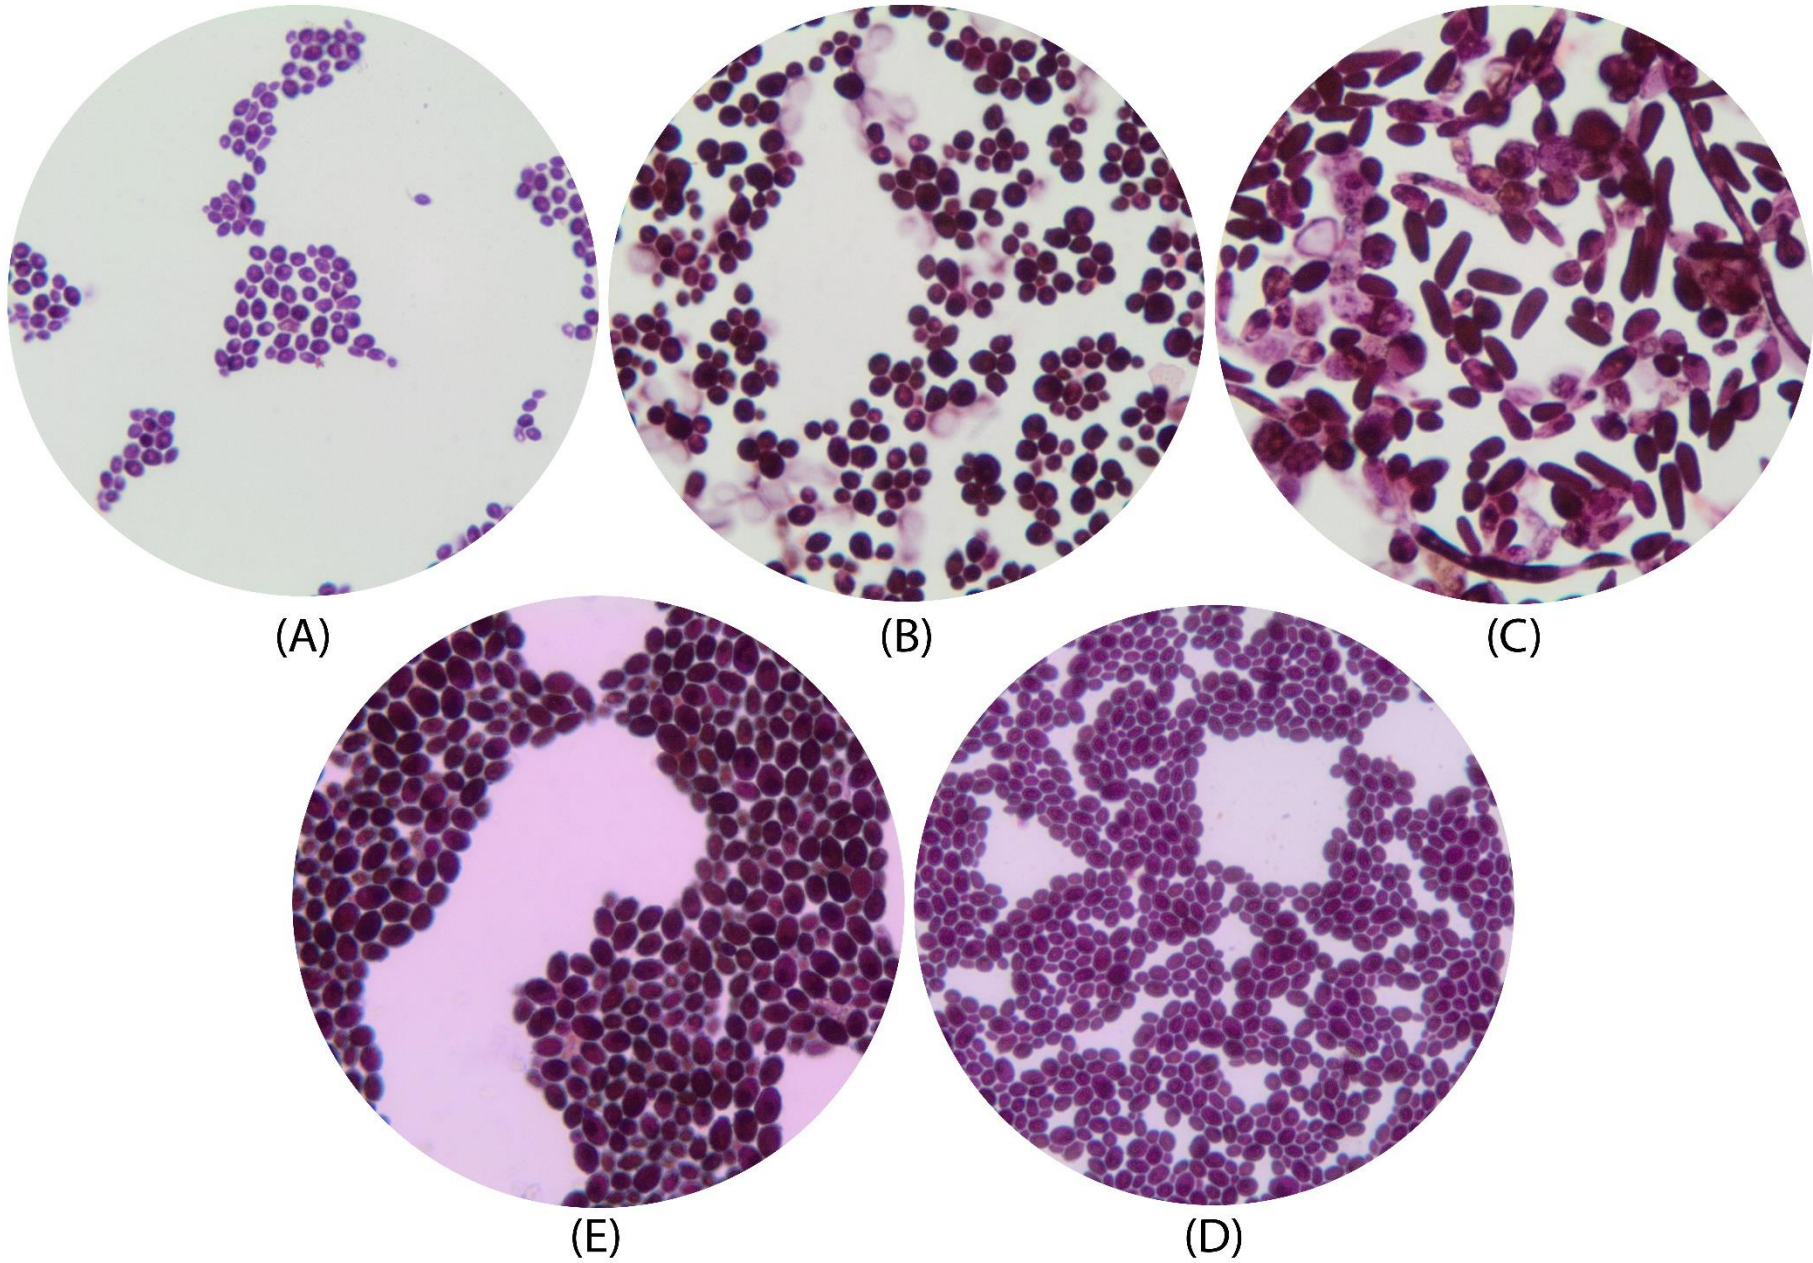

**Figure 1** – Gram strain images of: (A) *C. auris* NCPF 8971; (B) *C. albicans* NCPF 3179; (C) *C. tropicalis* NCPF 3111; (D) *C. glabrata* ATCC 2001; (E) *C. parapsilosis* ATCC 22019. 100x magnification.

225  
226  
227  
228  
229  
230  
231  
232  
233  
234  
235

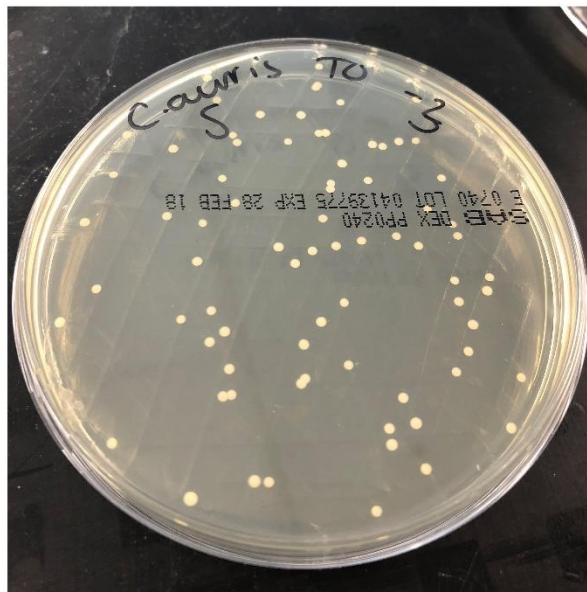

(A)

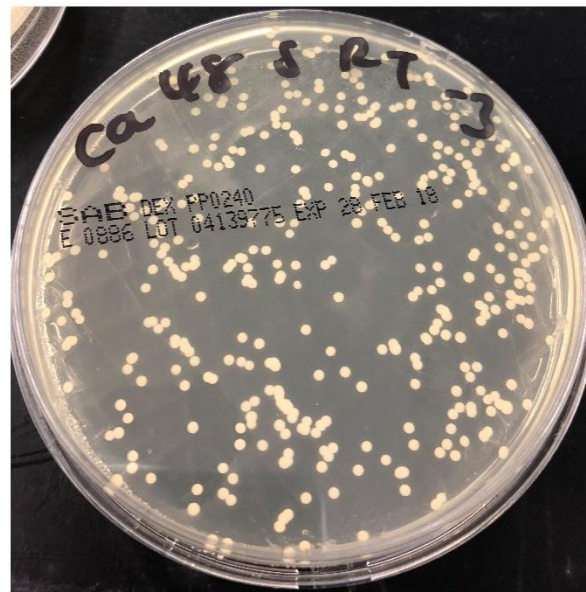

(B)

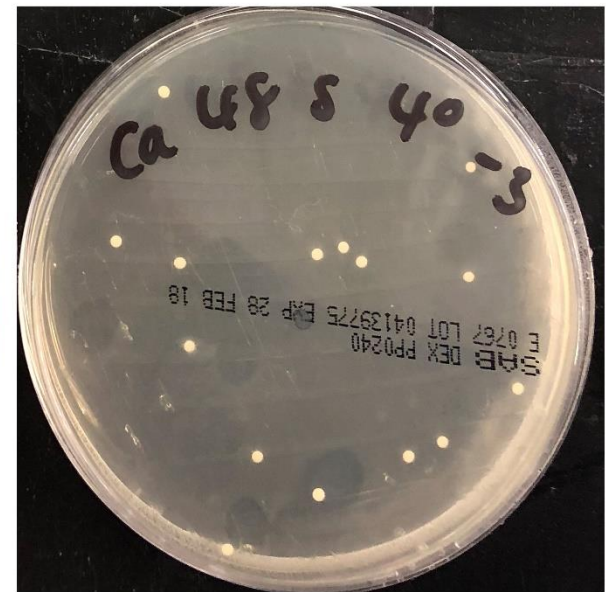

(C)

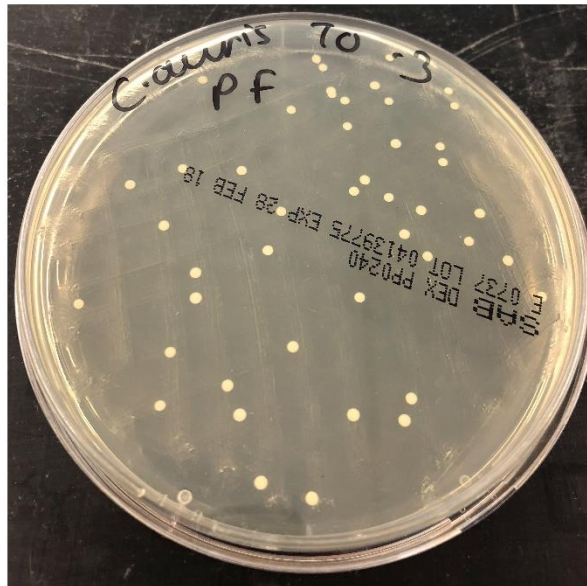

(D)

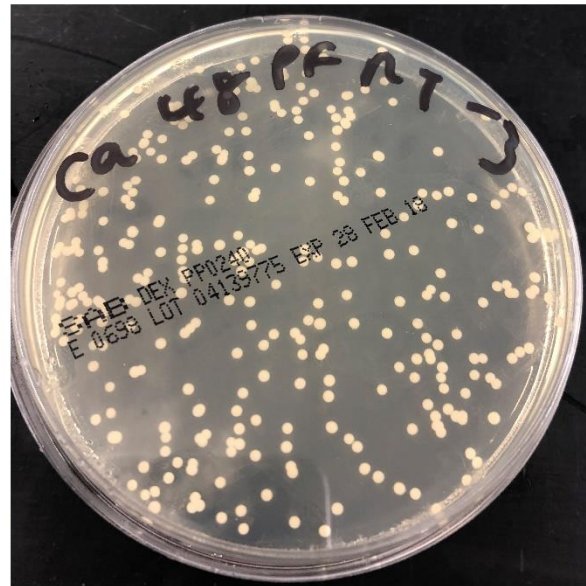

(E)

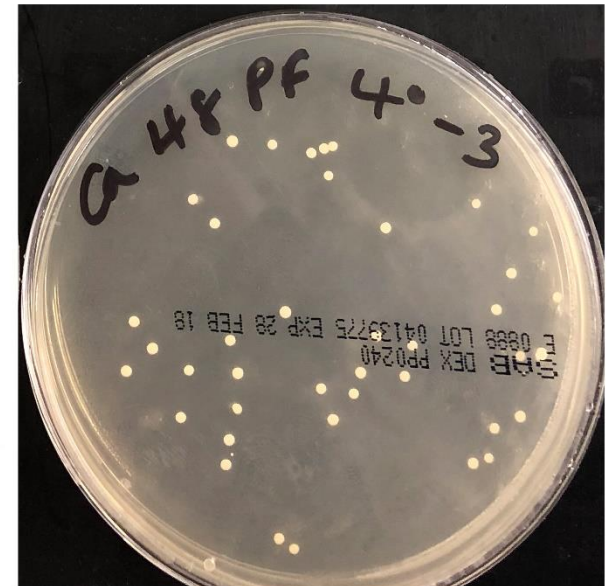

(F)

Figure 2 – Enumeration plates showing growth of *Candida auris* on SDA for (A) Sigma STS at T0; (B) Sigma STS at T48 and RT; (C) Sigma STS at T48 and 4°C; (D) Sigma Purflock STS at T0; (E) Sigma Purflock STS at T48 and RT; (F) Sigma Purflock STS at T48 and 4°C.
